# Supplementary material for: The control of malaria vectors in rice fields: a systematic review and meta-analysis
Source: PubMed Central journal article supplement (PMC9668837; doi:10.1038/s41598-022-24055-2), 2022-11-16
Supplement: 41598_2022_24055_MOESM1_ESM.pdf [file 41598_2022_24055_MOESM1_ESM.pdf]

# The control of malaria vectors in rice fields: A systematic review and meta-analysis

Supplementary Figure 1. Illustration of experimental study designs considered.

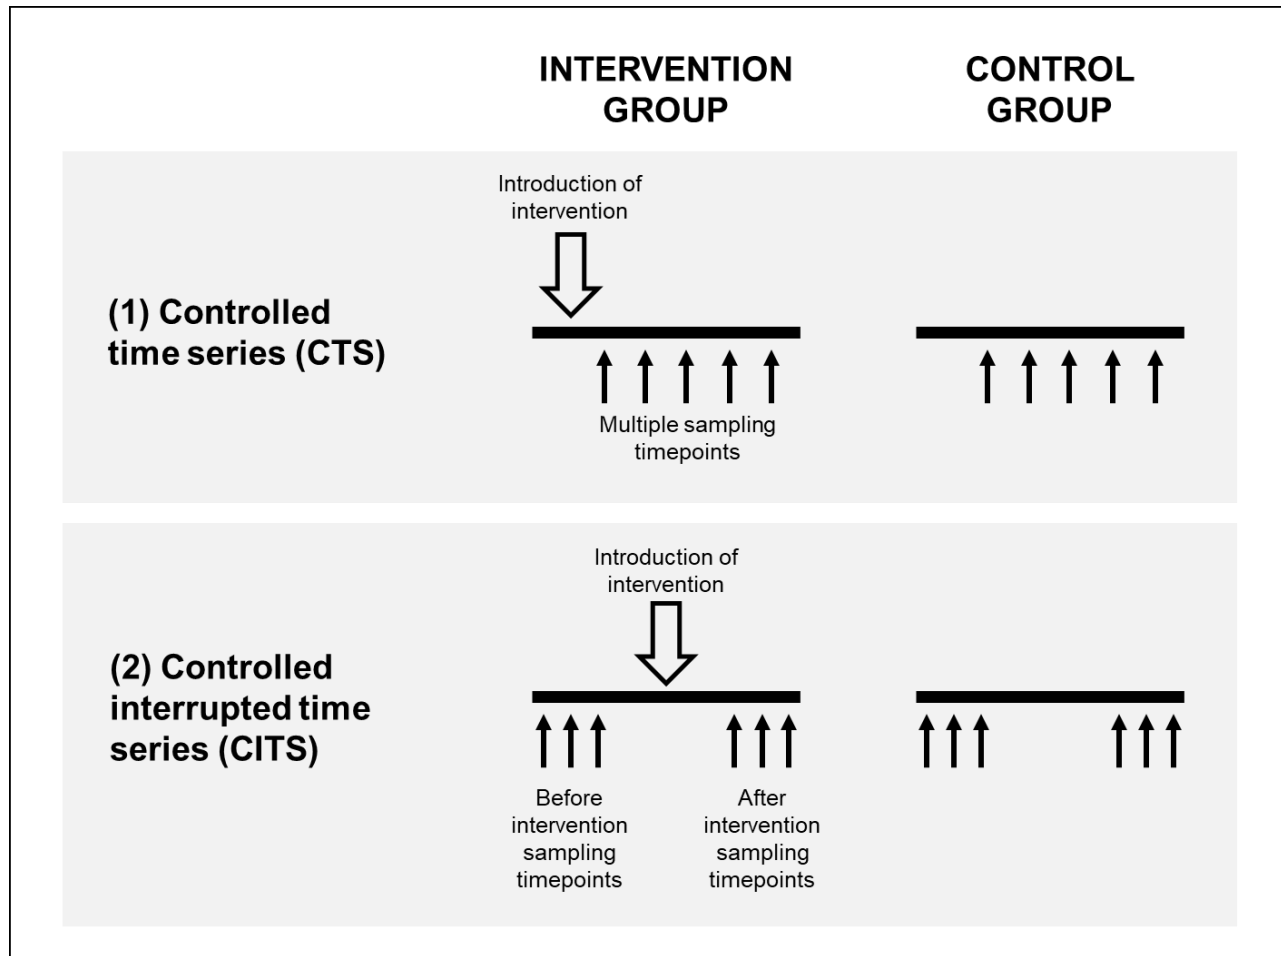

**Supplementary Table 1.** Risk of bias assessment for studies included in the quantitative analysis (controlled time series and controlled before-after studies, n=33).

|                         |         | <b>Allocation sequence generation</b>                                                               | <b>Allocation concealment</b>                                                                   | <b>Baseline outcome measurements</b>                                                                                                                                             | <b>Baseline features</b>                                                                                          | <b>Incomplete outcome data</b>                                                     | <b>Blinding (performance)</b>                                                     | <b>Blinding (detection)</b>                              | <b>Contamination</b>                                            | <b>Selective outcome reporting</b>                                                            |                                                           |
|-------------------------|---------|-----------------------------------------------------------------------------------------------------|-------------------------------------------------------------------------------------------------|----------------------------------------------------------------------------------------------------------------------------------------------------------------------------------|-------------------------------------------------------------------------------------------------------------------|------------------------------------------------------------------------------------|-----------------------------------------------------------------------------------|----------------------------------------------------------|-----------------------------------------------------------------|-----------------------------------------------------------------------------------------------|-----------------------------------------------------------|
| <b>Reference</b>        | Low     | Intervention randomly allocated                                                                     | Allocation conducted by investigators on all units at the start of the study                    | Outcomes were measured prior to the intervention and no important differences were present across study groups, or if imbalanced but appropriate adjusted analysis was performed | Features of the study and control areas are reported and similar                                                  | Missing outcome measures are unlikely to bias the results                          | Performance bias unlikely due to lack of knowledge of the allocated interventions | Outcomes were assessed blindly or outcomes are objective | It is unlikely that the control group received the intervention | No evidence that outcomes were selectively reported (all pre-specified outcomes are reported) | <b>Overall assessment</b><br>(Low / some concerns / high) |
|                         | High    | When a non-random method is used, and for non-randomised trials and controlled before-after studies | Technicians and investigators could foresee assignment, and for controlled before-after studies | Important differences were present and not adjusted for analysis                                                                                                                 | No report of characteristics in text or tables or if there are differences between control and intervention areas | Missing outcome data likely to bias the results                                    | Performance bias likely due to knowledge of the allocated interventions           | Outcomes were not assessed blindly                       | It is likely that the control group received the intervention   | Some important outcomes are subsequently omitted from the results                             |                                                           |
|                         | Unclear | Not specified in the paper                                                                          | Not specified in the paper                                                                      | If randomised trials have no baseline measure of outcome                                                                                                                         | Not specified in the paper                                                                                        | Not specified in the paper (do not assume 100% follow-up unless stated explicitly) | Not specified in the paper                                                        | Not specified in the paper                               | -                                                               | Not specified in the paper                                                                    |                                                           |
| Allen et al. 2008       |         | Unclear                                                                                             | High                                                                                            | Low                                                                                                                                                                              | Low                                                                                                               | Low                                                                                | High                                                                              | High                                                     | Low                                                             | Low                                                                                           | Some concerns                                             |
| Balaraman et al. 1983   |         | Unclear                                                                                             | High                                                                                            | Unclear                                                                                                                                                                          | Unclear                                                                                                           | Low                                                                                | High                                                                              | High                                                     | Low                                                             | Low                                                                                           | High                                                      |
| Bolay & Trpis 1989      |         | High                                                                                                | High                                                                                            | Low                                                                                                                                                                              | Low                                                                                                               | Low                                                                                | High                                                                              | High                                                     | Low                                                             | Low                                                                                           | Some concerns                                             |
| Bukhari et al. 2011     |         | High                                                                                                | High                                                                                            | Low                                                                                                                                                                              | Low                                                                                                               | Low                                                                                | High                                                                              | High                                                     | Low                                                             | Low                                                                                           | Some concerns                                             |
| Dennett et al. 2001     |         | Unclear                                                                                             | High                                                                                            | Low                                                                                                                                                                              | Unclear                                                                                                           | Low                                                                                | High                                                                              | High                                                     | Low                                                             | Low                                                                                           | High                                                      |
| Djegbe et al. 2020      |         | Unclear                                                                                             | High                                                                                            | Unclear                                                                                                                                                                          | Unclear                                                                                                           | Low                                                                                | High                                                                              | High                                                     | Low                                                             | Low                                                                                           | High                                                      |
| Hill & Cambournac 1941  |         | Unclear                                                                                             | High                                                                                            | Low                                                                                                                                                                              | Low                                                                                                               | Low                                                                                | High                                                                              | High                                                     | High                                                            | High                                                                                          | High                                                      |
| Kamel et al. 1972       |         | High                                                                                                | High                                                                                            | High                                                                                                                                                                             | High                                                                                                              | Low                                                                                | High                                                                              | High                                                     | High                                                            | Low                                                                                           | High                                                      |
| Karanja et al. 1994     |         | High                                                                                                | High                                                                                            | Low                                                                                                                                                                              | Low                                                                                                               | Low                                                                                | High                                                                              | High                                                     | Low                                                             | Low                                                                                           | Some concerns                                             |
| Kim et al. 2002         |         | High                                                                                                | High                                                                                            | Low                                                                                                                                                                              | Low                                                                                                               | Low                                                                                | High                                                                              | High                                                     | Low                                                             | Low                                                                                           | Some concerns                                             |
| Kramer et al. 1988      |         | Low                                                                                                 | High                                                                                            | Low                                                                                                                                                                              | High                                                                                                              | Low                                                                                | High                                                                              | Low                                                      | Low                                                             | Low                                                                                           | Some concerns                                             |
| Krishnasamy et al. 2003 |         | Unclear                                                                                             | High                                                                                            | High                                                                                                                                                                             | Unclear                                                                                                           | Low                                                                                | High                                                                              | High                                                     | Low                                                             | High                                                                                          | High                                                      |
| Marten et al. 2000      |         | Unclear                                                                                             | High                                                                                            | Low                                                                                                                                                                              | Low                                                                                                               | Low                                                                                | High                                                                              | High                                                     | Low                                                             | Low                                                                                           | Some concerns                                             |
| Martono 1988            |         | High                                                                                                | High                                                                                            | Low                                                                                                                                                                              | Low                                                                                                               | Low                                                                                | High                                                                              | High                                                     | Low                                                             | Low                                                                                           | Some concerns                                             |
| McLaughlin et al. 1982  |         | Unclear                                                                                             | High                                                                                            | Low                                                                                                                                                                              | Low                                                                                                               | Low                                                                                | High                                                                              | High                                                     | Low                                                             | Low                                                                                           | Some concerns                                             |
| Mutero et al. 2000      |         | Low                                                                                                 | High                                                                                            | Low                                                                                                                                                                              | Low                                                                                                               | Low                                                                                | High                                                                              | High                                                     | Low                                                             | Low                                                                                           | Some concerns                                             |

| Reference                    |         | Allocation sequence generation                                                                      | Allocation concealment                                                                          | Baseline outcome measurements                                                                                                                                                    | Baseline features                                                                                                 | Incomplete outcome data                                                            | Blinding (performance)                                                            | Blinding (detection)                                     | Contamination                                                   | Selective outcome reporting                                                                   | Overall assessment<br>(Low / some concerns / high) |
|------------------------------|---------|-----------------------------------------------------------------------------------------------------|-------------------------------------------------------------------------------------------------|----------------------------------------------------------------------------------------------------------------------------------------------------------------------------------|-------------------------------------------------------------------------------------------------------------------|------------------------------------------------------------------------------------|-----------------------------------------------------------------------------------|----------------------------------------------------------|-----------------------------------------------------------------|-----------------------------------------------------------------------------------------------|----------------------------------------------------|
|                              | Low     | Intervention randomly allocated                                                                     | Allocation conducted by investigators on all units at the start of the study                    | Outcomes were measured prior to the intervention and no important differences were present across study groups, or if imbalanced but appropriate adjusted analysis was performed | Features of the study and control areas are reported and similar                                                  | Missing outcome measures are unlikely to bias the results                          | Performance bias unlikely due to lack of knowledge of the allocated interventions | Outcomes were assessed blindly or outcomes are objective | It is unlikely that the control group received the intervention | No evidence that outcomes were selectively reported (all pre-specified outcomes are reported) |                                                    |
|                              | High    | When a non-random method is used, and for non-randomised trials and controlled before-after studies | Technicians and investigators could foresee assignment, and for controlled before-after studies | Important differences were present and not adjusted for analysis                                                                                                                 | No report of characteristics in text or tables or if there are differences between control and intervention areas | Missing outcome data likely to bias the results                                    | Performance bias likely due to knowledge of the allocated interventions           | Outcomes were not assessed blindly                       | It is likely that the control group received the intervention   | Some important outcomes are subsequently omitted from the results                             |                                                    |
|                              | Unclear | Not specified in the paper                                                                          | Not specified in the paper                                                                      | If randomised trials have no baseline measure of outcome                                                                                                                         | Not specified in the paper                                                                                        | Not specified in the paper (do not assume 100% follow-up unless stated explicitly) | Not specified in the paper                                                        | Not specified in the paper                               | -                                                               | Not specified in the paper                                                                    |                                                    |
| Palchick & Washino 1986      | Unclear | High                                                                                                | Unclear                                                                                         | Unclear                                                                                                                                                                          | Low                                                                                                               | High                                                                               | High                                                                              | Low                                                      | Low                                                             | High                                                                                          |                                                    |
| Rajendran & Reuben 1991      | Unclear | Unclear                                                                                             | Low                                                                                             | Low                                                                                                                                                                              | Low                                                                                                               | High                                                                               | High                                                                              | High                                                     | Low                                                             | High                                                                                          |                                                    |
| Rajendran et al. 1995        | Unclear | High                                                                                                | Low                                                                                             | Low                                                                                                                                                                              | Low                                                                                                               | High                                                                               | High                                                                              | Low                                                      | Low                                                             | Some concerns                                                                                 |                                                    |
| Rao et al. 1995              | Low     | High                                                                                                | Low                                                                                             | Low                                                                                                                                                                              | Low                                                                                                               | High                                                                               | High                                                                              | Low                                                      | Low                                                             | Some concerns                                                                                 |                                                    |
| Ravoahangimalala et al. 1994 | Unclear | Unclear                                                                                             | Low                                                                                             | Low                                                                                                                                                                              | Low                                                                                                               | High                                                                               | High                                                                              | Low                                                      | Low                                                             | Some concerns                                                                                 |                                                    |
| Reiter 1980                  | Unclear | High                                                                                                | Low                                                                                             | Low                                                                                                                                                                              | Low                                                                                                               | High                                                                               | High                                                                              | Low                                                      | Low                                                             | Some concerns                                                                                 |                                                    |
| Sogoba et al. 2007           | High    | High                                                                                                | High                                                                                            | Unclear                                                                                                                                                                          | Low                                                                                                               | High                                                                               | High                                                                              | High                                                     | Low                                                             | High                                                                                          |                                                    |
| Sundaraj & Reuben 1991       | Unclear | High                                                                                                | Low                                                                                             | Low                                                                                                                                                                              | Low                                                                                                               | High                                                                               | High                                                                              | Low                                                      | Low                                                             | Some concerns                                                                                 |                                                    |
| Takagi et al. 1996           | Unclear | High                                                                                                | Low                                                                                             | Unclear                                                                                                                                                                          | Low                                                                                                               | High                                                                               | High                                                                              | Low                                                      | Low                                                             | Some concerns                                                                                 |                                                    |
| Teng et al. 2005             | Low     | High                                                                                                | Low                                                                                             | Low                                                                                                                                                                              | Low                                                                                                               | High                                                                               | High                                                                              | Low                                                      | Low                                                             | Some concerns                                                                                 |                                                    |
| Victor et al. 1994           | Unclear | High                                                                                                | Low                                                                                             | Low                                                                                                                                                                              | Low                                                                                                               | High                                                                               | High                                                                              | Low                                                      | Low                                                             | Some concerns                                                                                 |                                                    |
| Victor & Reuben 2000         | Low     | High                                                                                                | Unclear                                                                                         | Low                                                                                                                                                                              | Low                                                                                                               | High                                                                               | High                                                                              | Low                                                      | Low                                                             | Some concerns                                                                                 |                                                    |
| Yap et al. 1982              | Unclear | Unclear                                                                                             | High                                                                                            | Low                                                                                                                                                                              | Low                                                                                                               | High                                                                               | High                                                                              | Low                                                      | Low                                                             | Some concerns                                                                                 |                                                    |
| Yu et al. 1981               | Unclear | Unclear                                                                                             | Unclear                                                                                         | High                                                                                                                                                                             | Low                                                                                                               | High                                                                               | High                                                                              | High                                                     | Low                                                             | High                                                                                          |                                                    |
| Yu & Lee 1989                | High    | High                                                                                                | Low                                                                                             | Low                                                                                                                                                                              | Low                                                                                                               | Low                                                                                | High                                                                              | Low                                                      | Low                                                             | Some concerns                                                                                 |                                                    |
| Yu et al. 1993               | High    | High                                                                                                | Low                                                                                             | Low                                                                                                                                                                              | Low                                                                                                               | High                                                                               | High                                                                              | Low                                                      | Low                                                             | Some concerns                                                                                 |                                                    |

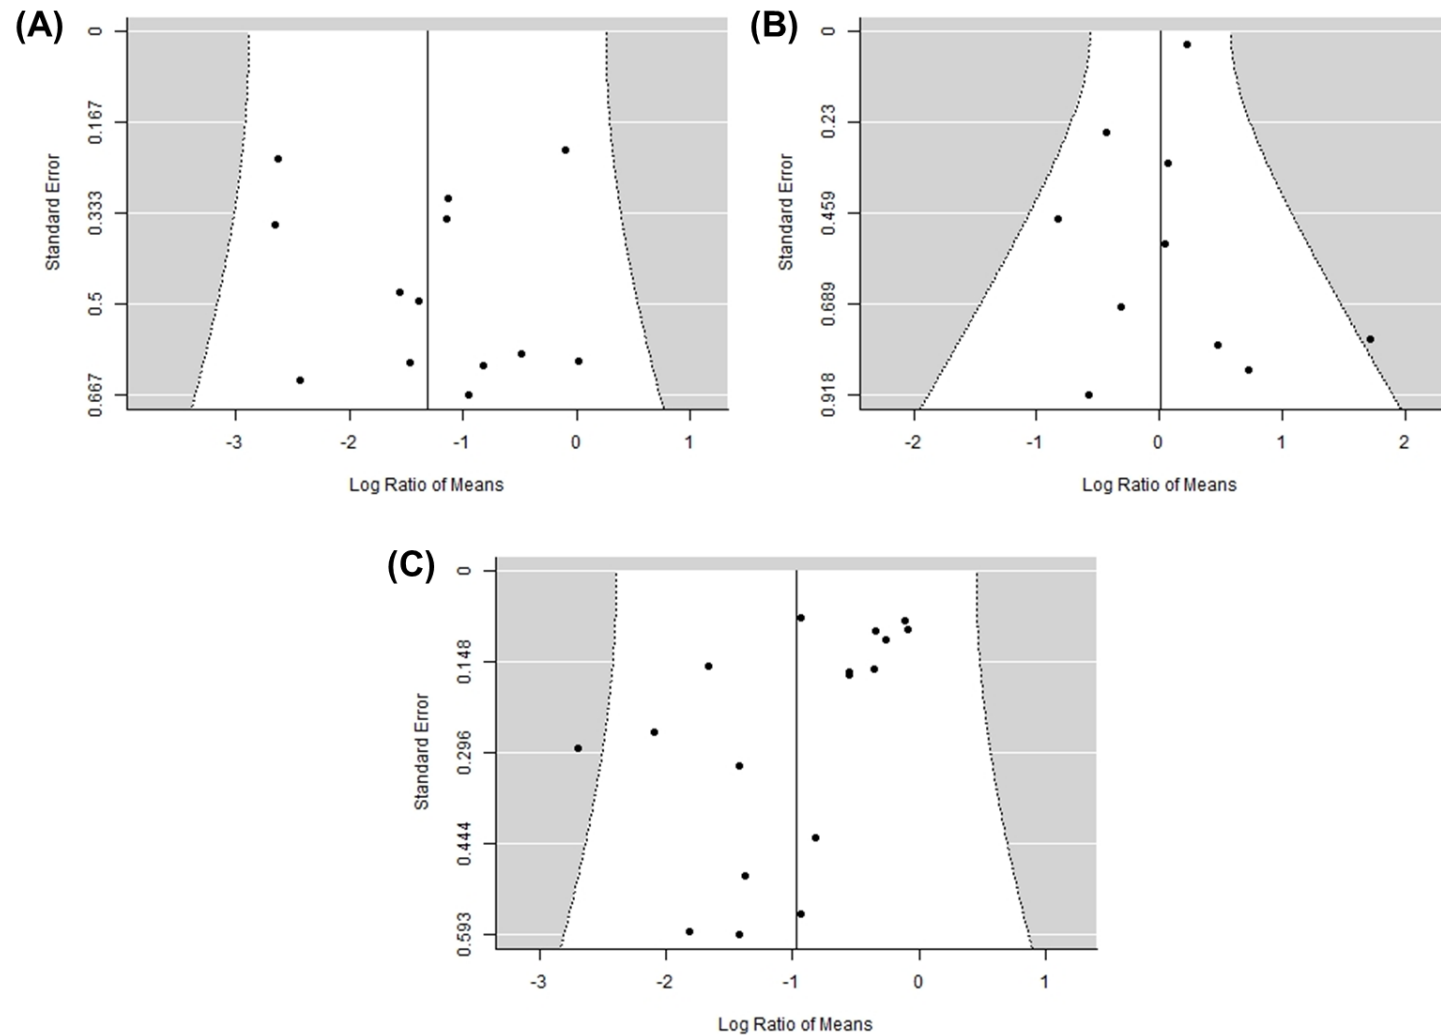

**Supplementary Figure 2.** Funnel plots assessing publication bias in the meta-analyses of the effect of riceland mosquito control. Specifically, **(A)** synthetic organic chemicals (test for funnel plot asymmetry:  $z = 0.54$ ,  $p = 0.59$ ), **(B)** water management techniques ( $z = 0.44$ ,  $p = 0.66$ ) and **(C)** bacterial larvicides ( $z = -2.26$ ,  $p = 0.024$ ), on *Anopheles* larval density.

**Supplementary Table 2.** Summary of findings of meta-analyses of the effect of riceland mosquito control on *Anopheles* larval density, arranged by the type of control, larval stage, study design and geographical region.

| Study                          | Country | Vector                     | Details of intervention (application method, rate, dose, fish species)                                                                                | Study design | Plot size (no. of replications) | Larval stage | Percent difference (95% CI) |
|--------------------------------|---------|----------------------------|-------------------------------------------------------------------------------------------------------------------------------------------------------|--------------|---------------------------------|--------------|-----------------------------|
| <b>Larviciding</b>             |         |                            |                                                                                                                                                       |              |                                 |              |                             |
| <b>Oils and surface agents</b> |         |                            |                                                                                                                                                       |              |                                 |              |                             |
| Bukhari et al. 2011            | Kenya   | <i>An. gambiae</i> s.l.    | Monomolecular surface film (Aquatain, silicone-based) at 1 ml/m <sup>2</sup> (1 <sup>st</sup> app.) and at 2 ml/m <sup>2</sup> (2 <sup>nd</sup> app.) | CTS          | 2000 m <sup>2</sup> (6)         | Early        | -24.3 (-89.0, +422.8)       |
| Reiter 1980                    | Kenya   | <i>An. gambiae</i> s.l.    | Monomolecular surface film (lecithin solution) at rate of 2.47 L/ha                                                                                   | CTS          | 600 m <sup>2</sup> (9)          | Early        | -52.1 (-74.5, -9.9)         |
| Karanja et al. 1994            | Kenya   | <i>An. arabiensis</i>      | Monomolecular surface film (Arosurf MSF) at 4 L/ha every 14 days                                                                                      | CITS         | 100 m <sup>2</sup> (4)          | Early        | <b>-93.5 (-99.8, 114.2)</b> |
| Bukhari et al. 2011            | Kenya   | <i>An. gambiae</i> s.l.    | Monomolecular surface film (Aquatain, silicone-based) at 1 ml/m <sup>2</sup> (1 <sup>st</sup> app.) and at 2 ml/m <sup>2</sup> (2 <sup>nd</sup> app.) | CTS          | 2000 m <sup>2</sup> (6)         | Late         | -32.5 (-71.6, +60.6)        |
| Reiter 1980                    | Kenya   | <i>An. gambiae</i> s.l.    | Monomolecular surface film (lecithin solution) at rate of 2.47 L/ha                                                                                   | CTS          | 600 m <sup>2</sup> (9)          | Late         | -59.5 (-73.0, -39.2)        |
| <b>Bacterial larvicide</b>     |         |                            |                                                                                                                                                       |              |                                 |              |                             |
| Balaraman et al. 1983          | India   | <i>An. subpictus</i>       | <i>Bti</i> serotype H-14 (VCRC B-17), with dose 27 x 10 <sup>5</sup> spores/ml                                                                        | CTS          | 1000 m <sup>2</sup> (5)         | Early        | -75.8 (-88.8, -47.9)        |
| Dennett et al. 2001            | USA     | <i>An. quadrimaculatus</i> | <i>Bacillus sphaericus</i> (Bs), VectoLex WDG, aerial application at 1.68 kg/ha                                                                       | CTS          | 2000 m <sup>2</sup> (2)         | Early        | -7.3 (-31.7, +25.8)         |
| Dennett et al. 2001            | USA     | <i>An. quadrimaculatus</i> | Bs, VectoLex WDG, aerial application at 0.56 kg/ha                                                                                                    | CTS          | 2000 m <sup>2</sup> (2)         | Early        | -17.3 (-35.9, +6.8)         |
| Sundaraj & Reuben 1991         | India   | <i>An. subpictus</i>       | Bs, Biocide-S 1593M, at 2.2 kg/ha                                                                                                                     | CTS          | 440 m <sup>2</sup> (3)          | Early        | -65.5 (-87.3, -6.0)         |
| Sundaraj & Reuben 1991         | India   | <i>An. subpictus</i>       | Bs, Biocide-S 1593M, at 4.3 kg/ha                                                                                                                     | CTS          | 440 m <sup>2</sup> (3)          | Early        | -65.2 (-89.7, +17.3)        |
| <b>-46.7 (-67.4, -6.3)</b>     |         |                            |                                                                                                                                                       |              |                                 |              |                             |
| Balaraman et al. 1983          | India   | <i>An. subpictus</i>       | <i>Bti</i> serotype H-14 (VCRC B-17), with dose 27 x 10 <sup>5</sup> spores/ml                                                                        | CTS          | 1000 m <sup>2</sup> (5)         | Late         | -66.5 (-88.3, -3.7)         |
| Dennett et al. 2001            | USA     | <i>An. quadrimaculatus</i> | Bs, VectoLex WDG, aerial application at 1.68 kg/ha                                                                                                    | CTS          | 2000 m <sup>2</sup> (2)         | Late         | -14.5 (-26.4, -0.8)         |
| Dennett et al. 2001            | USA     | <i>An. quadrimaculatus</i> | Bs, VectoLex WDG, aerial application at 0.56 kg/ha                                                                                                    | CTS          | 2000 m <sup>2</sup> (2)         | Late         | -11.0 (-25.5, +6.3)         |
| Sundaraj & Reuben 1991         | India   | <i>An. subpictus</i>       | Bs, Biocide-S 1593M, at 2.2 kg/ha                                                                                                                     | CTS          | 440 m <sup>2</sup> (3)          | Late         | -89.1 (-96.9, -62.0)        |
| Sundaraj & Reuben 1991         | India   | <i>An. subpictus</i>       | Bs, Biocide-S 1593M, at 4.3 kg/ha                                                                                                                     | CTS          | 440 m <sup>2</sup> (3)          | Late         | -92.3 (-97.3, -77.9)        |
| <b>-67.2 (-88.0, -10.7)</b>    |         |                            |                                                                                                                                                       |              |                                 |              |                             |
| Balaraman 1983                 | India   | <i>An. subpictus</i>       | <i>Bti</i> serotype H-14 (VCRC B-17), with dose 27 x 10 <sup>5</sup> spores/ml                                                                        | CTS          | 1000 m <sup>2</sup> (5)         | Pupae        | -95.7 (-99.1, -78.2)        |
| Dennett et al. 2001            | USA     | <i>An. quadrimaculatus</i> | Bs, VectoLex WDG, aerial application at 1.68 kg/ha                                                                                                    | CTS          | 2000 m <sup>2</sup> (2)         | Pupae        | -3.1 (-6.3, +0.3)           |
| Dennett et al. 2001            | USA     | <i>An. quadrimaculatus</i> | Bs, VectoLex WDG, aerial application at 0.56 kg/ha                                                                                                    | CTS          | 2000 m <sup>2</sup> (2)         | Pupae        | -1.7 (-5.0, +1.7)           |
| Sundaraj & Reuben 1991         | India   | <i>An. subpictus</i>       | Bs, Biocide-S 1593M, at 2.2 kg/ha                                                                                                                     | CTS          | 440 m <sup>2</sup> (3)          | Pupae        | -99.0 (-99.8, -93.9)        |
| Sundaraj & Reuben 1991         | India   | <i>An. subpictus</i>       | Bs, Biocide-S 1593M, at 4.3 kg/ha                                                                                                                     | CTS          | 440 m <sup>2</sup> (3)          | Pupae        | -99.4 (-99.9, -94.8)        |
| <b>-91.1 (-99.0, -22.0)</b>    |         |                            |                                                                                                                                                       |              |                                 |              |                             |

**Supplementary Table 3.** Summary of findings of meta-analyses of the effect of riceland mosquito control and rice-growing techniques on *Anopheles* human biting rate (HBR), arranged by the type of control or intervention.

| Study                              | Country | Predominant vector      | Details of intervention (application method, rate, dose, fish species)                                                                                                                   | Study design | Plot size (no. of replications)                   | Outcome                                 | Relative percent difference (95% CI)        |
|------------------------------------|---------|-------------------------|------------------------------------------------------------------------------------------------------------------------------------------------------------------------------------------|--------------|---------------------------------------------------|-----------------------------------------|---------------------------------------------|
| <b>Larviciding</b>                 |         |                         |                                                                                                                                                                                          |              |                                                   |                                         |                                             |
| <b>Synthetic organic chemicals</b> |         |                         |                                                                                                                                                                                          |              |                                                   |                                         |                                             |
| Kamel et al. 1972                  | Egypt   | <i>An. pharoensis</i>   | Iodofenphos (NUVANOL N20U), aerial application at 1.5-3 L/ha                                                                                                                             | CITS         | 500,000 m <sup>2</sup> - 1,200,000 m <sup>2</sup> | HBR indoors (HLC)<br>HBR outdoors (HLC) | -73.4 (-94.1, +5.4)<br>-52.0 (-80.2, +15.9) |
| <b>Water management system</b>     |         |                         |                                                                                                                                                                                          |              |                                                   |                                         |                                             |
| Sogoba et al. 2007                 | Mali    | <i>An. gambiae</i> s.l. | <i>Hors-casier</i> plot sector (no technical assistance in irrigation system and therefore lack efficient drainage systems) vs. <i>casier</i> plot sector (renovated irrigation systems) | CTS          | 1000 m <sup>2</sup> (4)                           | HBR                                     | +44.2 (-50.7, +321.9)                       |

**Supplementary Table 4.** The association between riceland mosquito control and larval density in studies included in the qualitative analysis (n=13).

| Study                              | Country | Vector                                           | Details of intervention (application method, rate, dose, fish species)                                                                | Study design | Plot size (no. of replications) | Outcome        | Relative percent difference (%)      |
|------------------------------------|---------|--------------------------------------------------|---------------------------------------------------------------------------------------------------------------------------------------|--------------|---------------------------------|----------------|--------------------------------------|
| <b>Synthetic organic chemicals</b> |         |                                                  |                                                                                                                                       |              |                                 |                |                                      |
| Gahan & Nob 1955                   | USA     | <i>An. quadrimaculatus</i>                       | Organophosphate (Parathion)                                                                                                           | CTS          | 4000 m <sup>2</sup>             | Larval density | +57.9                                |
| Gahan & Nob 1955                   | USA     | <i>An. quadrimaculatus</i>                       | Organophosphate (Bayer L 13/59)                                                                                                       | CTS          | 4000 m <sup>2</sup>             | Larval density | +80.0                                |
| Gahan & Nob 1955                   | USA     | <i>An. quadrimaculatus</i>                       | Organophosphate (Shell OS 2046)                                                                                                       | CTS          | 4000 m <sup>2</sup>             | Larval density | +85.0                                |
| Magy 1949                          | USA     | <i>An. freeborni</i>                             | Organochlorine (DDT), varying concentrations, aerial application                                                                      | CITS         | 7284 ha                         | Larval density | -55.0 - -100.0                       |
| Washino et al. 1972                | USA     | <i>An. freeborni</i>                             | Organophosphate (Chlorpyrifos, Dursban)                                                                                               | CITS         | 1855 ha                         | Adult density  | -11.1                                |
| Weathersbee et al. 1986            | USA     | <i>An. quadrimaculatus</i>                       | Mixture of malathion, heavy aromatic naphtha and resmethrin/PBO at 221.8 ml/min, aerial application and <i>Bti</i> ground application | CITS         | 1758 ha                         | Adult density  | -59.9 12 hr post,<br>-6.8 36 hr post |
| <b>Bacterial larvicides</b>        |         |                                                  |                                                                                                                                       |              |                                 |                |                                      |
| Bassi et al. 1989                  | USA     | <i>An. quadrimaculatus</i>                       | <i>Bti</i> (Vectobac) at 78 ml Al/ha                                                                                                  | CITS         | 61,000 m <sup>2</sup>           | Larval density | -72.3                                |
| Lacey & Inman 1985                 | USA     | <i>An. crucians</i>                              | <i>Bti</i> (Vectobac) at 5.6 kg/ha, aerial application                                                                                | CITS         | 4000 m <sup>2</sup>             | Larval density | -91.9                                |
| Lacey & Inman 1985                 | USA     | <i>An. crucians</i>                              | <i>Bti</i> (Vectobac) at 11.2 kg/ha, aerial application                                                                               | CITS         | 4000 m <sup>2</sup>             | Larval density | -94.2                                |
| Lacey & Inman 1985                 | USA     | <i>An. crucians</i>                              | <i>Bti</i> (Vectobac) at 22.5 kg/ha, aerial application                                                                               | CITS         | 4000 m <sup>2</sup>             | Larval density | -96.0                                |
| Lacey & Inman 1985                 | USA     | <i>An. crucians</i>                              | <i>Bti</i> (Bactimos) at 2.8 kg/ha, hand application                                                                                  | CITS         | 4000 m <sup>2</sup>             | Larval density | -100.0                               |
| Lacey & Inman 1985                 | USA     | <i>An. crucians</i>                              | <i>Bti</i> (Bactimos) at 5.6 5 kg/ha, aerial application                                                                              | CITS         | 4000 m <sup>2</sup>             | Larval density | -100.0                               |
| Lacey & Inman 1985                 | USA     | <i>An. crucians</i>                              | <i>Bti</i> (Bactimos) at 11.2 5 kg/ha, aerial application                                                                             | CITS         | 4000 m <sup>2</sup>             | Larval density | -100.0                               |
| Lacey & Inman 1985                 | USA     | <i>An. crucians</i>                              | <i>Bti</i> (Teknar) at 1.7 kg/ha, hand application                                                                                    | CITS         | 4000 m <sup>2</sup>             | Larval density | -100.0                               |
| Lacey & Inman 1985                 | USA     | <i>An. crucians</i>                              | <i>Bti</i> (Teknar) at 3.0 kg/ha, aerial application                                                                                  | CITS         | 4000 m <sup>2</sup>             | Larval density | -100.0                               |
| Lacey & Inman 1985                 | USA     | <i>An. crucians</i>                              | <i>Bti</i> (Teknar) at 7.5 kg/ha, aerial application                                                                                  | CITS         | 4000 m <sup>2</sup>             | Larval density | -100.0                               |
| Lacey & Inman 1985                 | USA     | <i>An. quadrimaculatus</i> & <i>An. crucians</i> | <i>Bs</i> (isolate 2362), granular formulation                                                                                        | CTS          | 400 m <sup>2</sup> (3)          | Larval density | -68.0                                |

| Study                                           | Country    | Vector                     | Details of intervention (application method, rate, dose, fish species)                                                                                                      | Study design | Plot size (no. of replications) | Outcome        | Relative percent difference (%) |
|-------------------------------------------------|------------|----------------------------|-----------------------------------------------------------------------------------------------------------------------------------------------------------------------------|--------------|---------------------------------|----------------|---------------------------------|
| Romi et al. 1993                                | Madagascar | <i>An. arabiensis</i>      | <i>Bti</i> (Vectobac 12AS) at 1 kg/ha                                                                                                                                       | CITS         | 180 m <sup>2</sup>              | Larval density | -89.0                           |
| Romi et al. 1993                                | Madagascar | <i>An. arabiensis</i>      | <i>Bti</i> (Vectobac 12AS) at 0.6 kg/ha                                                                                                                                     | CITS         | 260 m <sup>2</sup>              | Larval density | -100.0                          |
| Romi et al. 1993                                | Madagascar | <i>An. arabiensis</i>      | <i>Bti</i> (Vectobac GR) at 10 kg/ha                                                                                                                                        | CITS         | 220 m <sup>2</sup>              | Larval density | -100.0                          |
| Romi et al. 1993                                | Madagascar | <i>An. arabiensis</i>      | <i>Bti</i> (Vectobac GR) at 5 kg/ha                                                                                                                                         | CITS         | 410 m <sup>2</sup>              | Larval density | -100.0                          |
| Romi et al. 1993                                | Madagascar | <i>An. arabiensis</i>      | <i>Bti</i> (ABG 6185) at 10 kg/ha                                                                                                                                           | CITS         | 160 m <sup>2</sup>              | Larval density | -84.0                           |
| Romi et al. 1993                                | Madagascar | <i>An. arabiensis</i>      | <i>Bti</i> (ABG 6185) at 5 kg/ha                                                                                                                                            | CITS         | 160 m <sup>2</sup>              | Larval density | -57.0                           |
| Sandoski et al. 1985                            | USA        | <i>An. quadrimaculatus</i> | <i>Bti</i> (Teknar) at 0.54 l/ha                                                                                                                                            | CITS         | 17,000 m <sup>2</sup>           | Larval density | -97.9                           |
| Sandoski et al. 1985                            | USA        | <i>An. quadrimaculatus</i> | <i>Bti</i> (Teknar) at 0.27 l/ha                                                                                                                                            | CITS         | 17,000 m <sup>2</sup>           | Larval density | -94.4                           |
| Sandoski et al. 1985                            | USA        | <i>An. quadrimaculatus</i> | <i>Bti</i> (Teknar) at 0.11 l/ha                                                                                                                                            | CITS         | 17,000 m <sup>2</sup>           | Larval density | -93.0                           |
| Sandoski et al. 1985                            | USA        | <i>An. quadrimaculatus</i> | <i>Bti</i> (Teknar) at 0.07 l/ha                                                                                                                                            | CITS         | 17,000 m <sup>2</sup>           | Larval density | -71.1                           |
| Sandoski et al. 1985                            | USA        | <i>An. quadrimaculatus</i> | <i>Bti</i> (Teknar) at 0.04 l/ha                                                                                                                                            | CITS         | 17,000 m <sup>2</sup>           | Larval density | -21.8                           |
| Stark et al. 1983                               | USA        | <i>An. quadrimaculatus</i> | <i>Bti</i> (serotype H-14 ABG-6108)                                                                                                                                         | CTS          | 36 m <sup>2</sup>               | Larval density | -97.0                           |
| Insect growth regulator                         |            |                            |                                                                                                                                                                             |              |                                 |                |                                 |
| Kottkamp & Meisch 1985                          | USA        | <i>An. quadrimaculatus</i> | Insect growth regulator (Bay Sir 8514) at 49 g ai/ha                                                                                                                        | CTS          | 36 m <sup>2</sup>               | Larval density | -73.7                           |
| Insect growth regulator and bacterial larvicide |            |                            |                                                                                                                                                                             |              |                                 |                |                                 |
| Bassi et al. 1989                               | USA        | <i>An. quadrimaculatus</i> | Methoprene (insect growth regulator) and <i>Bti</i> (Duplex) at 78 ml AI/ha                                                                                                 | CITS         | 61,000 m <sup>2</sup>           | Larval density | -95.1                           |
| Biological control                              |            |                            |                                                                                                                                                                             |              |                                 |                |                                 |
| Blaustein 1992                                  | USA        | <i>An. freeborni</i>       | <i>G. affinis</i> : 10 gravid female, 10 male adults                                                                                                                        | CTS          | 83.6 m <sup>2</sup> (6)         | Larval density | -7.3                            |
| Blaustein 1992                                  | USA        | <i>An. freeborni</i>       | <i>L. cyanellus</i> : 20 adults                                                                                                                                             | CTS          | 83.6 m <sup>2</sup> (6)         | Larval density | +28.2                           |
| Blaustein 1992                                  | USA        | <i>An. freeborni</i>       | <i>G. affinis</i> : 10 gravid female, 10 male adults and <i>L. cyanellus</i> : 20 adults                                                                                    | CTS          | 83.6 m <sup>2</sup> (6)         | Larval density | -92.2                           |
| Hoy et al. 1971                                 | USA        | <i>An. freeborni</i>       | <i>G. affinis</i> at stocking rate of 50 per acre                                                                                                                           | CTS          | (3)                             | Larval density | -83.0                           |
| Hoy et al. 1971                                 | USA        | <i>An. freeborni</i>       | <i>G. affinis</i> at stocking rate of 100 per acre                                                                                                                          | CTS          | (3)                             | Larval density | -48.5                           |
| Hoy et al. 1971                                 | USA        | <i>An. freeborni</i>       | <i>G. affinis</i> at stocking rate of 150 per acre                                                                                                                          | CTS          | (3)                             | Larval density | -59.2                           |
| Hoy et al. 1971                                 | USA        | <i>An. freeborni</i>       | <i>G. affinis</i> at stocking rate of 200 per acre                                                                                                                          | CTS          | (3)                             | Larval density | -87.0                           |
| Hoy et al. 1971                                 | USA        | <i>An. freeborni</i>       | <i>G. affinis</i> at stocking rate of 250 per acre                                                                                                                          | CTS          | (3)                             | Larval density | -82.4                           |
| Hoy et al. 1971                                 | USA        | <i>An. freeborni</i>       | <i>G. affinis</i> at stocking rate of 300 per acre                                                                                                                          | CTS          | (3)                             | Larval density | -59.2                           |
| Intermittent irrigation                         |            |                            |                                                                                                                                                                             |              |                                 |                |                                 |
| Luh 1984                                        | China      | <i>An. sinensis</i>        | Wet irrigation (a type of intermittent irrigation where fields are filled with a shallow layer of water that may disappear between 24-48 hours) vs. conventional irrigation | CTS          |                                 | Larval density | -84.0 - -86.0                   |

**Supplementary Table 5.** Summary of findings of meta-analyses of the effect of rice-growing techniques on *Anopheles* larval density, arranged by larval stage, study design and geographical region.

| Study                          | Country  | Vector                | Comparison                                                                                                                                                                                         | Plot size (no. of replications) | Larval stage | Relative percent difference (95% CI) |
|--------------------------------|----------|-----------------------|----------------------------------------------------------------------------------------------------------------------------------------------------------------------------------------------------|---------------------------------|--------------|--------------------------------------|
| <b>Intermittent irrigation</b> |          |                       |                                                                                                                                                                                                    |                                 |              |                                      |
| Hill & Cambournac 1941         | Portugal | <i>Anopheles</i>      | 10d wet, 7d dry cycle                                                                                                                                                                              | 2000 m <sup>2</sup> (4)         | Early        | -36.9 (-64.7, +12.8)                 |
| Mutero et al. 2000             | Kenya    | <i>An. arabiensis</i> | Flooded before transplanting, drained during transplanting, flooded after transplanting                                                                                                            | 750 m <sup>2</sup> (4)          | Early        | +32.6 (+11.9, +57.2)                 |
| Mutero et al. 2000             | Kenya    | <i>An. arabiensis</i> | Flooded before transplanting, drained during transplanting, alternately flooded and drained after transplanting                                                                                    | 750 m <sup>2</sup> (4)          | Early        | +770.6 (+113.4, +3450.9)             |
|                                |          |                       |                                                                                                                                                                                                    |                                 |              | <b>+69.9 (-57.3, +575.3)</b>         |
| Hill & Cambournac 1941         | Portugal | <i>Anopheles</i>      | 10d wet, 7d dry cycle                                                                                                                                                                              | 2000 m <sup>2</sup> (4)         | Late         | -32.6 (-64.5, +28.1)                 |
| Mutero et al. 2000             | Kenya    | <i>An. arabiensis</i> | Flooded before transplanting, drained during transplanting, flooded after transplanting                                                                                                            | 750 m <sup>2</sup> (4)          | Late         | -34.7 (-45.4, -21.7)                 |
| Mutero et al. 2000             | Kenya    | <i>An. arabiensis</i> | Flooded before transplanting, drained during transplanting, alternately flooded and drained after transplanting                                                                                    | 750 m <sup>2</sup> (4)          | Late         | -35.0 (-51.9, -12.1)                 |
| Rajendran et al. 1995          | India    | <i>An. subpictus</i>  | 2.5 cm depth maintained for the first 10-14 DAT. Fields subsequently dried out and re-irrigated to 5 cm depth immediately after all standing water had disappeared (3-5d after irrigation stopped) | 16.2 ha - 22.3 ha               | Late         | -28.8 (-71.0, +74.9)                 |
|                                |          |                       |                                                                                                                                                                                                    |                                 |              | <b>-34.5 (-43.5, -24.0)</b>          |



**Supplementary Table 6.** The adoptability of each intervention according to rice farmers.

|                                                                                               | Reference               | Intervention or rice-growing method          | Description                                                                                                                                                                                                                                                                                                                                                                                                                                               |
|-----------------------------------------------------------------------------------------------|-------------------------|----------------------------------------------|-----------------------------------------------------------------------------------------------------------------------------------------------------------------------------------------------------------------------------------------------------------------------------------------------------------------------------------------------------------------------------------------------------------------------------------------------------------|
| Interventions and rice-growing techniques that were accepted amongst local farmers            | Karanja et al. 1994     | Monomolecular surface film                   | Appropriate for small scale rice cultivation with no more than 1.5 hectares of paddy fields                                                                                                                                                                                                                                                                                                                                                               |
|                                                                                               | Victor & Reuben 1994    | Fish                                         | Net profit 2.5 times larger for rice cum fish than rice alone – can provide more income to farmers if successfully promoted                                                                                                                                                                                                                                                                                                                               |
|                                                                                               | Bolay & Trpis 1989      | Fish                                         | An additional source of protein in tropical countries with malnutrition                                                                                                                                                                                                                                                                                                                                                                                   |
|                                                                                               | Rajendran & Reuben 1991 | Azolla                                       | Grain yields not only increased by 9-14% in treated fields, but weed production halved, reducing need and cost of labour for weeding. Azolla also kept field moist when fields dried out. Farmers were thoroughly impressed.                                                                                                                                                                                                                              |
|                                                                                               | Hill & Cambournac 1941  | Intermittent irrigation                      | Economic advantages outweigh disadvantages: increased cost in rebuilding field, relaying irrigation and drainage ditches, increased care necessary in preparation of fields, careful supervision of interruptions to irrigation but once fields are set up for practice, economic advantages resulting from increased yield and better conditions for labour stimulate interest on growers and practice spreading slowly                                  |
|                                                                                               | Luh 1984                | Intermittent irrigation                      | Rice yield increased by 13% and water consumption considerably lower. Method was therefore well-accepted and used on more than 100,000 ha in 1980                                                                                                                                                                                                                                                                                                         |
| Interventions and rice-growing techniques that needed improvement for increased acceptability | Washino et al. 1972     | Synthetic organic chemical                   | This cannot be done economically on an individual field basis. Low volume technique and synchronisation of large areas required to increase success                                                                                                                                                                                                                                                                                                       |
|                                                                                               | Sundaraj & Reuben 1991  | Bacterial larvicide                          | Application costs were too much; took one person 2.5 hours to spray 0.5 hectares. A less labour-intensive system must be developed (perhaps through multiple point source introduction into irrigation water)                                                                                                                                                                                                                                             |
|                                                                                               | Rao et al. 1995         | Neem                                         | Strong incentive to adopt strategy for economic reasons – but commercial availability at an affordable price will promote large scale use                                                                                                                                                                                                                                                                                                                 |
|                                                                                               | Rajendran et al. 1995   | Intermittent irrigation                      | Farmers were convinced of utility based on water conservation but doubted ability to organise equitable distribution during years of water scarcity, preferring neutral supervision of a government agency                                                                                                                                                                                                                                                |
|                                                                                               | Mutero et al. 2000      | Intermittent irrigation                      | Required more labour, which was already scarce since irrigated rice in the area was labour intensive. Provision of labour only expected if there was a real direct benefit in relation to rice yield, which there was not. Water saving would have benefited farmers during times of water scarcity but no apparent advantage in terms of water saving. The method could not be recommended for use by farmers unless rice yield increased significantly. |
|                                                                                               | Krishnasamy et al. 2003 | Intermittent irrigation                      | Efficacy heavily dependent on farmer practices and considerable effort would be needed to change practices on a large scale                                                                                                                                                                                                                                                                                                                               |
|                                                                                               | Djegbe et al. 2020      | Intermittent irrigation and land preparation | Need to assess on a wider scale the feasibility of implementing intermittent flooding with respect to farmer acceptance and required changes in irrigation system design and management                                                                                                                                                                                                                                                                   |

**Supplementary Table 7.** Search strategy in multiple databases (last search date = 10 October 2020).

| Search set | Medline                                                                                | EMBASE                                                                                 | Global Health                                                                          | Web of Science                                               |
|------------|----------------------------------------------------------------------------------------|----------------------------------------------------------------------------------------|----------------------------------------------------------------------------------------|--------------------------------------------------------------|
| 1          | Exp malaria/                                                                           | Exp malaria/                                                                           | Exp malaria/                                                                           | TS = malari*                                                 |
| 2          | Exp Anopheles/                                                                         | Exp malaria control/                                                                   | Exp anopheles/                                                                         | TS = anophel*                                                |
| 3          | Exp Culicidae/                                                                         | Exp Anopheles/                                                                         | Exp Culicidae/                                                                         | TS = disease vector\$                                        |
| 4          | Exp mosquito control/                                                                  | Exp mosquito control/                                                                  | Exp disease vectors/                                                                   | TS = mosquito*                                               |
| 5          | Exp disease vectors/                                                                   | Exp insect vector/                                                                     | Exp entomology/                                                                        | TS = mosquito control                                        |
| 6          | Exp entomology/                                                                        | Exp mosquito/                                                                          | Exp medical entomology/                                                                | TS = malaria control                                         |
| 7          | Malaria.tw.                                                                            | Exp mosquito vector/                                                                   | Malaria.ab.                                                                            | 1 OR 2 OR 3 OR 4 OR 5 OR 6                                   |
| 8          | Malari*.tw.                                                                            | Malaria.tw.                                                                            | Malari*.ab.                                                                            | TS = rice                                                    |
| 9          | Anophel*.tw.                                                                           | Malari*.tw.                                                                            | Anophel*.ab.                                                                           | TS = "rice field\$"                                          |
| 10         | Mosquito*.tw.                                                                          | Anophel*.tw.                                                                           | Mosquito*.ab.                                                                          | TS = "ricefield\$"                                           |
| 11         | Entomolog*.tw.                                                                         | Mosquito*.tw.                                                                          | Entomolg*.ab.                                                                          | TS = "rice cultivat**"                                       |
| 12         | Vector control.tw.                                                                     | Entomolog*.tw.                                                                         | 1 or 2 or 3 or 4 or 5 or 6                                                             | TS = "rice grow**"                                           |
| 13         | 1 or 2 or 3 or 4 or 5 or 6                                                             | 1 or 2 or 3 or 4 or 5 or 6 or 7                                                        | 7 or 8 or 9 or 10 or 11                                                                | TS = "rice padd**"                                           |
| 14         | 7 or 8 or 9 or 10 or 11 or 12                                                          | 8 or 9 or 10 or 11 or 12                                                               | 12 or 13                                                                               | TS = "rice irrigat**"                                        |
| 15         | 13 or 14                                                                               | 13 or 14                                                                               | Exp rice/                                                                              | TS = "water management"                                      |
| 16         | Exp oryza/                                                                             | Exp rice/                                                                              | Exp flooded rice/                                                                      | TS = weed*                                                   |
| 17         | Exp agriculture/                                                                       | Exp agriculture/                                                                       | Exp rice fields/                                                                       | TS = fertili*                                                |
| 18         | Herbicides/                                                                            | Exp "irrigation (agriculture)"                                                         | Exp agriculture/                                                                       | TS = "plant variet**"                                        |
| 19         | Rice.tw.                                                                               | Exp tillage/                                                                           | Exp irrigation/                                                                        | 8 OR 9 OR 10 OR 11 OR 12 OR 13 OR 14 OR 15 OR 16 OR 17 OR 18 |
| 20         | Rice field\$.tw.                                                                       | Rice.tw.                                                                               | Rice.ab.                                                                               | 19 AND 7                                                     |
| 21         | Ricefield\$.tw.                                                                        | Rice field\$.tw.                                                                       | Rice field\$.ab.                                                                       |                                                              |
| 22         | Rice adj4 cultivat*.tw.                                                                | Ricefield\$.tw.                                                                        | Ricefield\$                                                                            |                                                              |
| 23         | Rice adj4 grow*.tw.                                                                    | Rice adj4 cultivat*.tw.                                                                | Rice adj4 cultivat*.ab.                                                                |                                                              |
| 24         | Rice adj4 practice\$.tw.                                                               | Rice adj4 grow*.tw.                                                                    | Rice adj4 grow*.tw.                                                                    |                                                              |
| 25         | Rice adj4 technique\$.tw.                                                              | Rice adj4 practice\$.tw.                                                               | Rice adj4 practice\$.ab.                                                               |                                                              |
| 26         | Rice adj2 padd*.tw.                                                                    | Rice adj4 technique\$.tw.                                                              | Rice adj4 technique\$.ab.                                                              |                                                              |
| 27         | Rice adj2 irrigat*.tw.                                                                 | Rice adj2 padd*.tw.                                                                    | Rice adj2 padd*.ab.                                                                    |                                                              |
| 28         | Rice adj4 method*.tw.                                                                  | Rice adj2 irrigat*.tw.                                                                 | Rice adj2 irrigat*.ab.                                                                 |                                                              |
| 29         | Monolayer.tw.                                                                          | Rice adj4 method*.tw.                                                                  | Rice adj4 method*.ab.                                                                  |                                                              |
| 30         | Fertili*.tw.                                                                           | Monolayer.tw.                                                                          | Monolayer.ab.                                                                          |                                                              |
| 31         | Weed*.tw.                                                                              | Fertili*.tw.                                                                           | Fertili*.ab.                                                                           |                                                              |
| 32         | Plant adj3 variet*.tw.                                                                 | Weed*.tw.                                                                              | Weed*.ab.                                                                              |                                                              |
| 33         | Water adj3 management.tw.                                                              | Plant adj3 variet*.tw.                                                                 | Plant adj3 variet*.ab.                                                                 |                                                              |
| 34         | 16 or 17 or 18                                                                         | Water adj3 management.tw.                                                              | Water adj3 management.ab.                                                              |                                                              |
| 35         | 19 or 20 or 21 or 22 or 23 or 24 or 25 or 26 or 27 or 28 or 29 or 30 or 31 or 32 or 33 | 16 or 17 or 18 or 19                                                                   | 15 or 16 or 17 or 18 or 19                                                             |                                                              |
| 36         | 34 or 35                                                                               | 20 or 21 or 22 or 23 or 24 or 25 or 26 or 27 or 28 or 29 or 30 or 31 or 32 or 33 or 34 | 20 or 21 or 22 or 23 or 24 or 25 or 26 or 27 or 28 or 29 or 30 or 31 or 32 or 33 or 34 |                                                              |
| 37         | 15 and 36                                                                              | 35 or 36                                                                               | 35 or 36                                                                               |                                                              |
| 38         |                                                                                        | 15 and 37                                                                              | 14 and 37                                                                              |                                                              |
